# Supplementary material for: Neuroimmune Modulation Through Vagus Nerve Stimulation Reduces Inflammatory Activity in Crohn’s Disease Patients: A Prospective Open-label Study
Source: PubMed Central journal article supplement (PMC10798868; doi:10.1093/ecco-jcc/jjad151), 2023-09-21
Supplement: jjad151_suppl_supplementary_material.pdf [file jjad151_suppl_supplementary_material.pdf]

# Supplementary Tables and Figures

# Supplementary Figure 1. The per patient change in CDAI over time

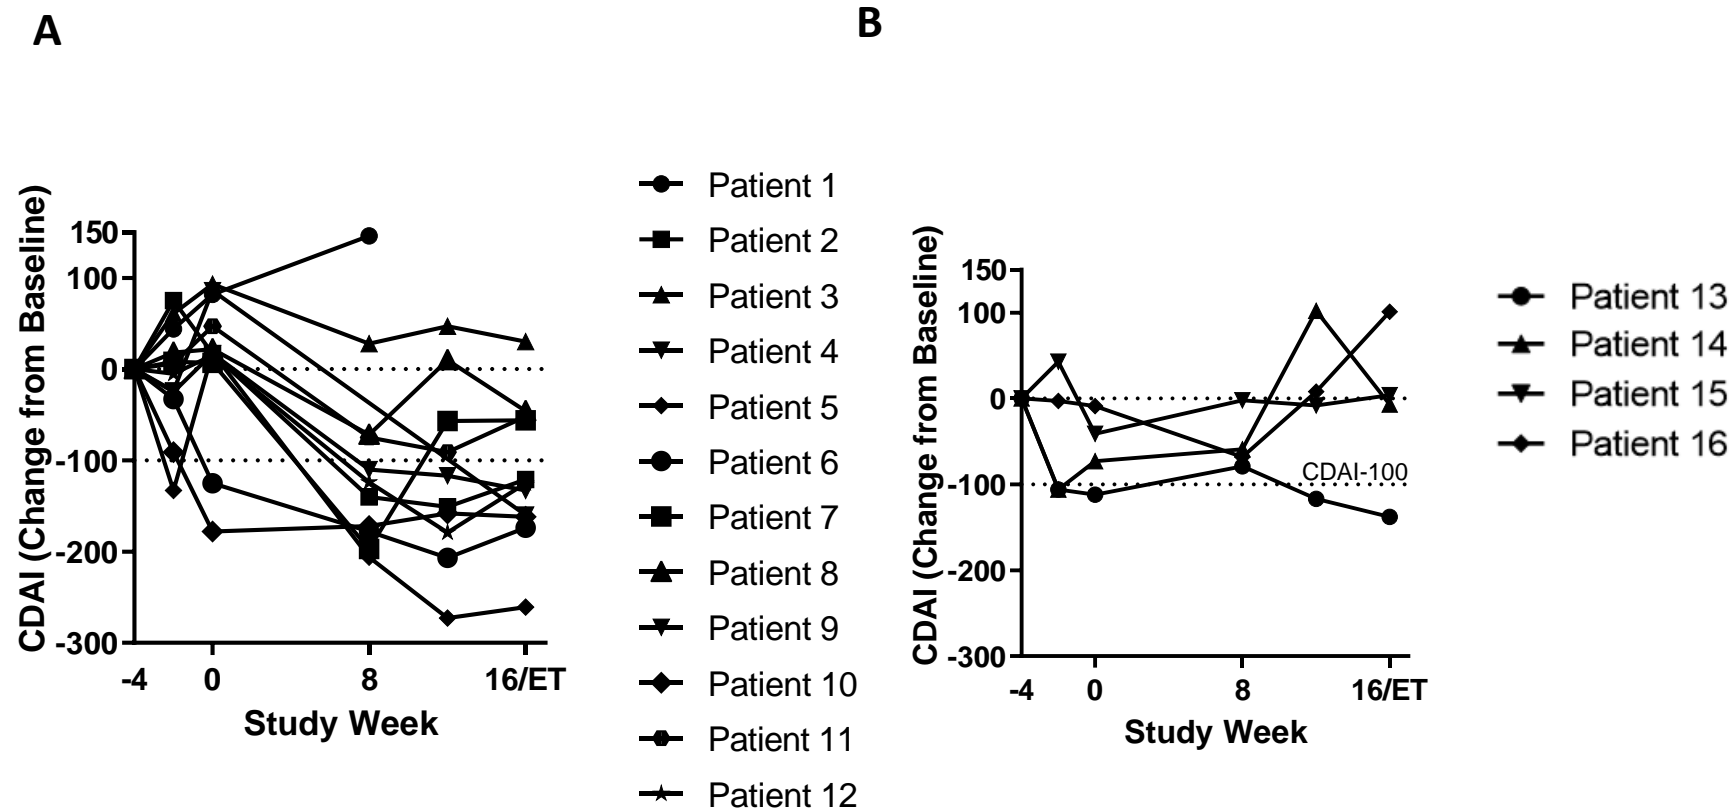

**Supplementary Figure 1. Clinical efficacy.** Per patient change from baseline in CDAI for **[A]** Patients treated with vagus nerve stimulation without biologics: “Stimulation Monotherapy group” and **[B]** Patients treated with vagus nerve stimulation and with biologics. Patient 13 was on steady dose of vedolizumab; Patient 14 was on a steady dose of infliximab; Patient 15 washed out infliximab during study, then added adalimumab; Patient 16 washed out infliximab during study. ET, Early termination.

# Supplementary Figure 2. The per patient CDAI over time

A

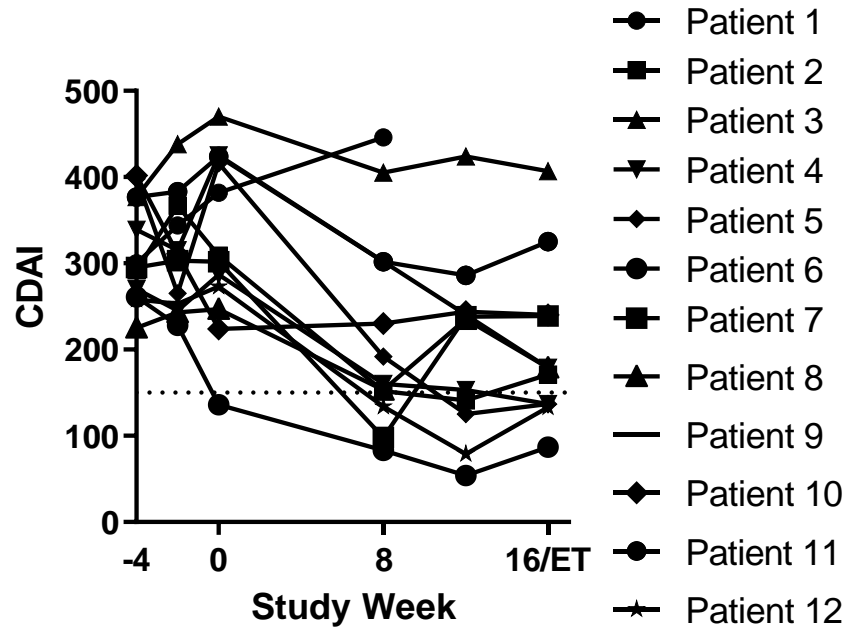

B

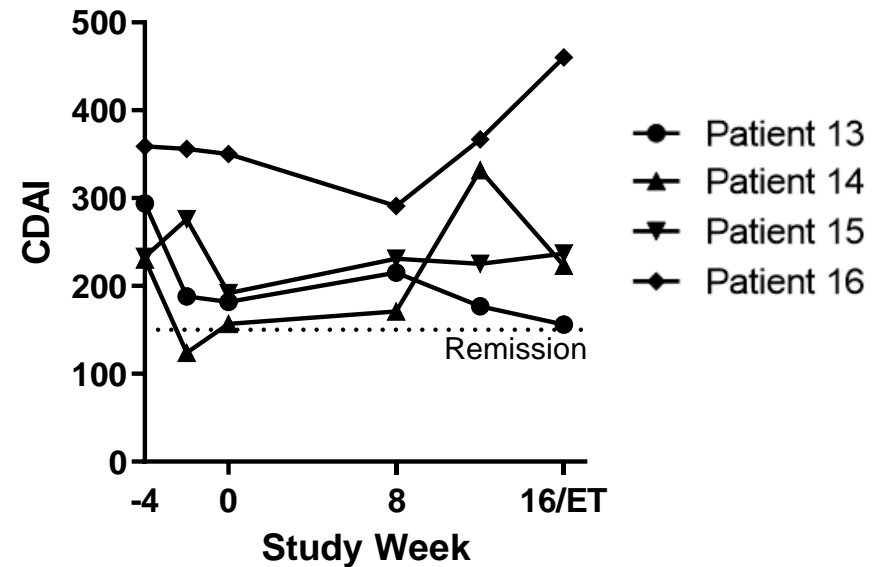

**Supplementary Figure 2. Clinical efficacy.** Per patient CDAI over time for **[A]** Patients treated with vagus nerve stimulation without biologics: “Stimulation Monotherapy group” and **[B]** Patients treated with vagus nerve stimulation and with biologics. Patient 13 was on steady dose of vedolizumab; Patient 14 was on a steady dose of infliximab; Patient 15 washed out infliximab during study, then added adalimumab; Patient 16 washed out infliximab during study. ET, Early termination.

# Supplementary Figure 3. Endoscopic outcomes

A

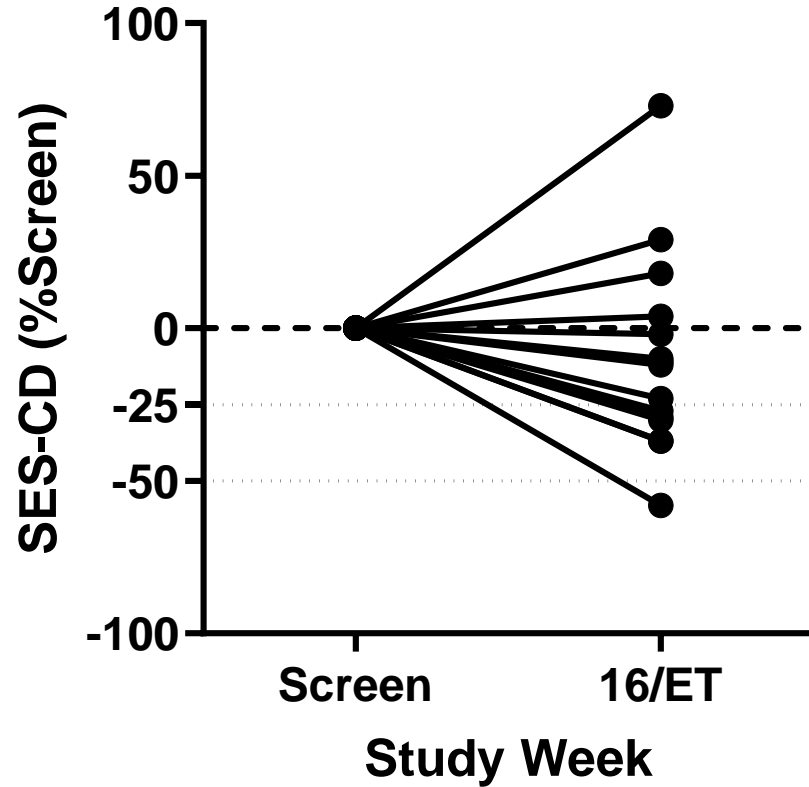

**Supplementary Figure 3. Endoscopic outcomes. [A]** % change from screening (baseline) SES-CD for each patient at screening visit and Week 16 / Early Termination visit. ET, Early termination.

# Supplementary Figure 3. Endoscopic outcomes

**B**

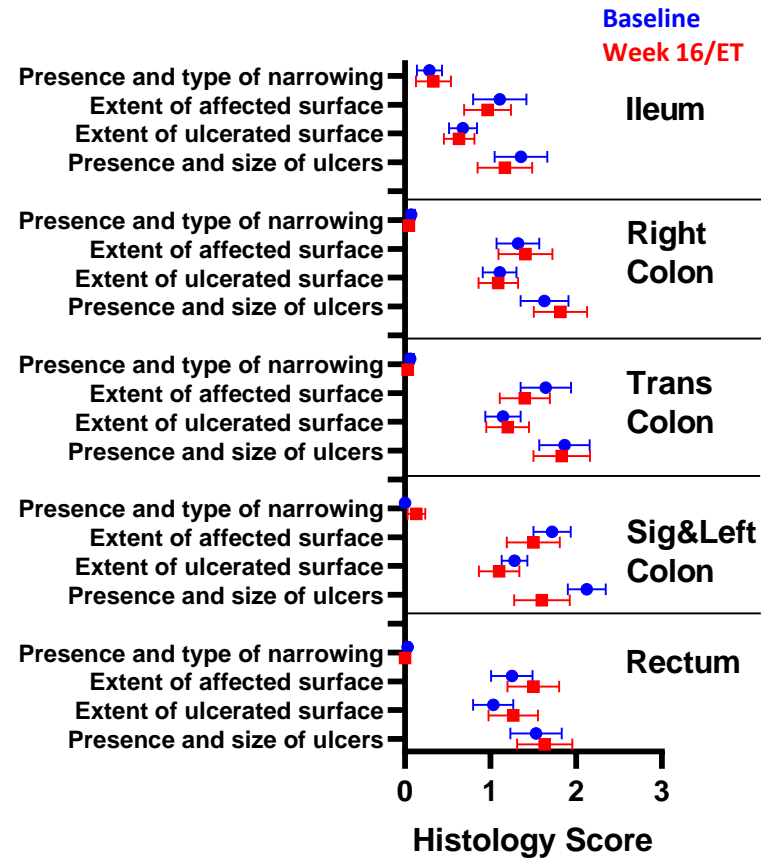

**C**

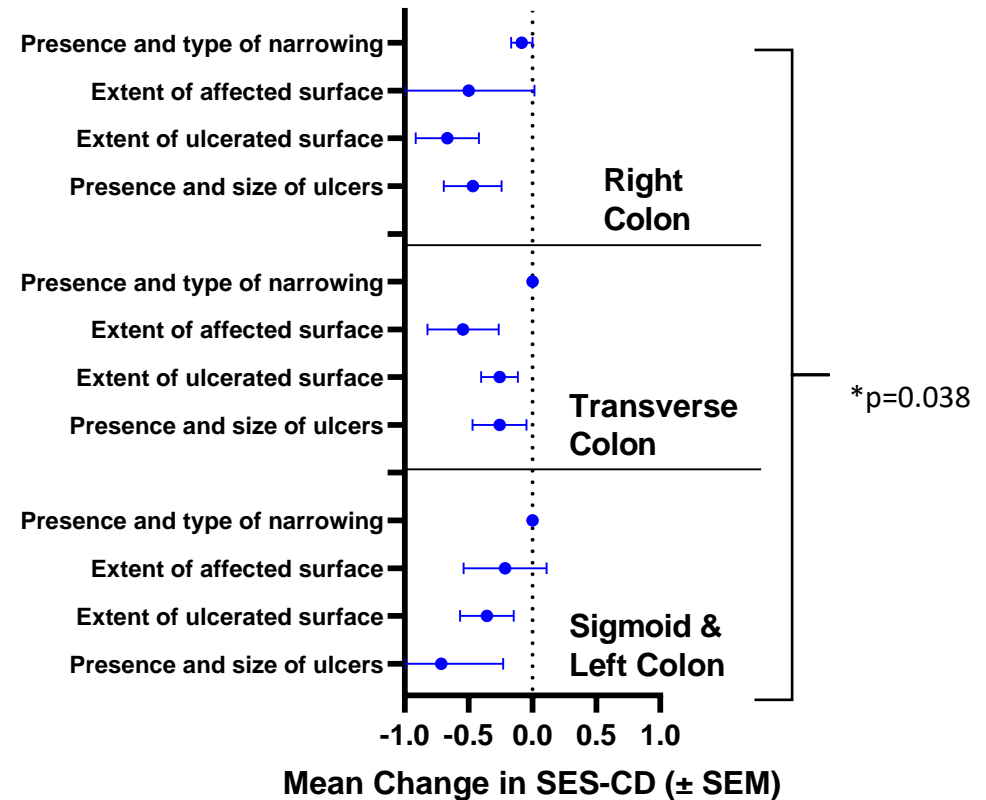

**Supplementary Figure 3. Endoscopic outcomes.** [B] SES-CD subscores of efficacy population (n=16) and [C] Change in colonic SES-CD subscores of patients that achieved CDAI-100 response (n=8). Data plotted as mean  $\pm$  SEM. Endoscopic change from baseline was analyzed by REML. \* p<0.05. SES-CD, Simple endoscopic score - Crohn's disease; ET, Early termination.

# Supplementary Figure 4: Per Patient Changes in Faecal Calprotectin

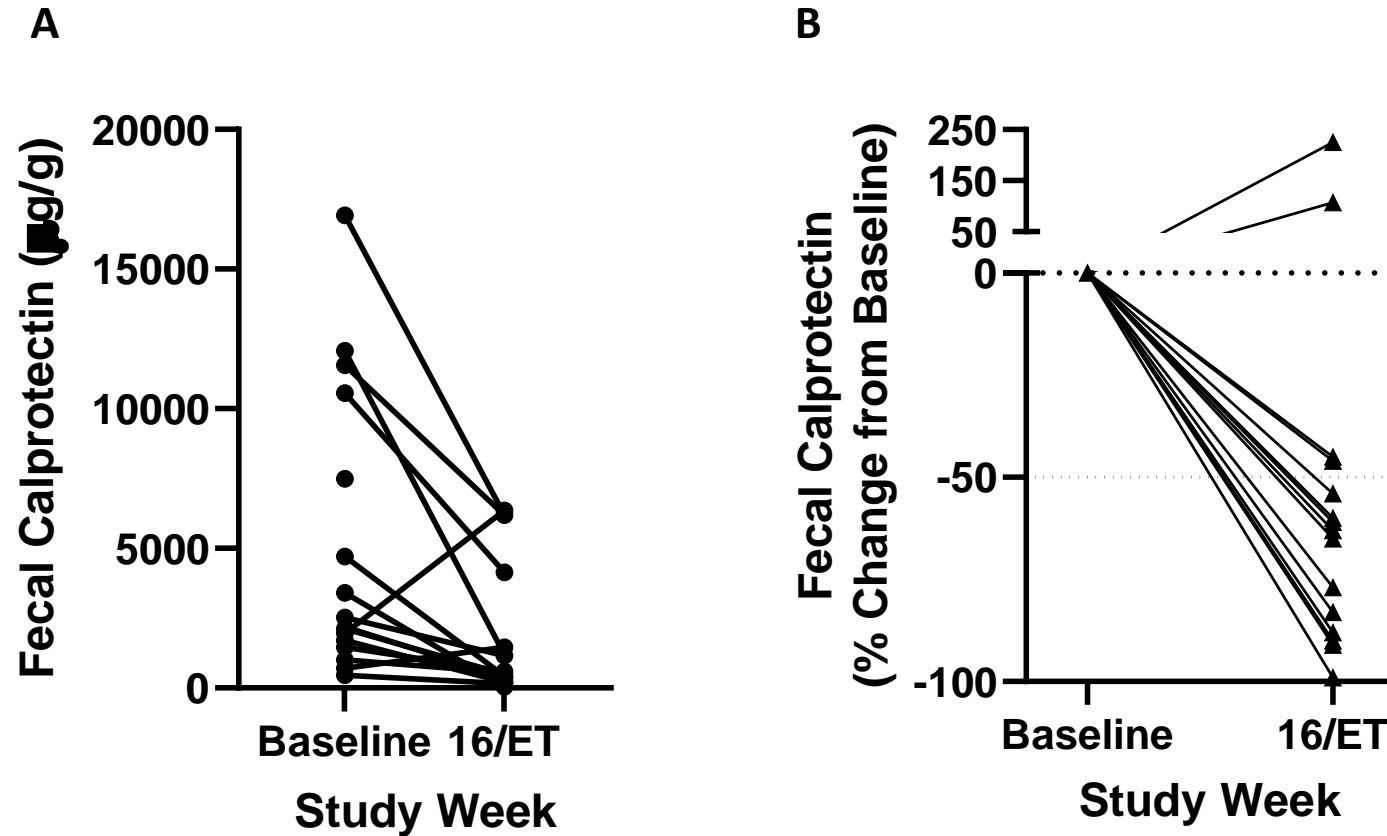

# Supplementary Figure 5: Change in Disability Indices

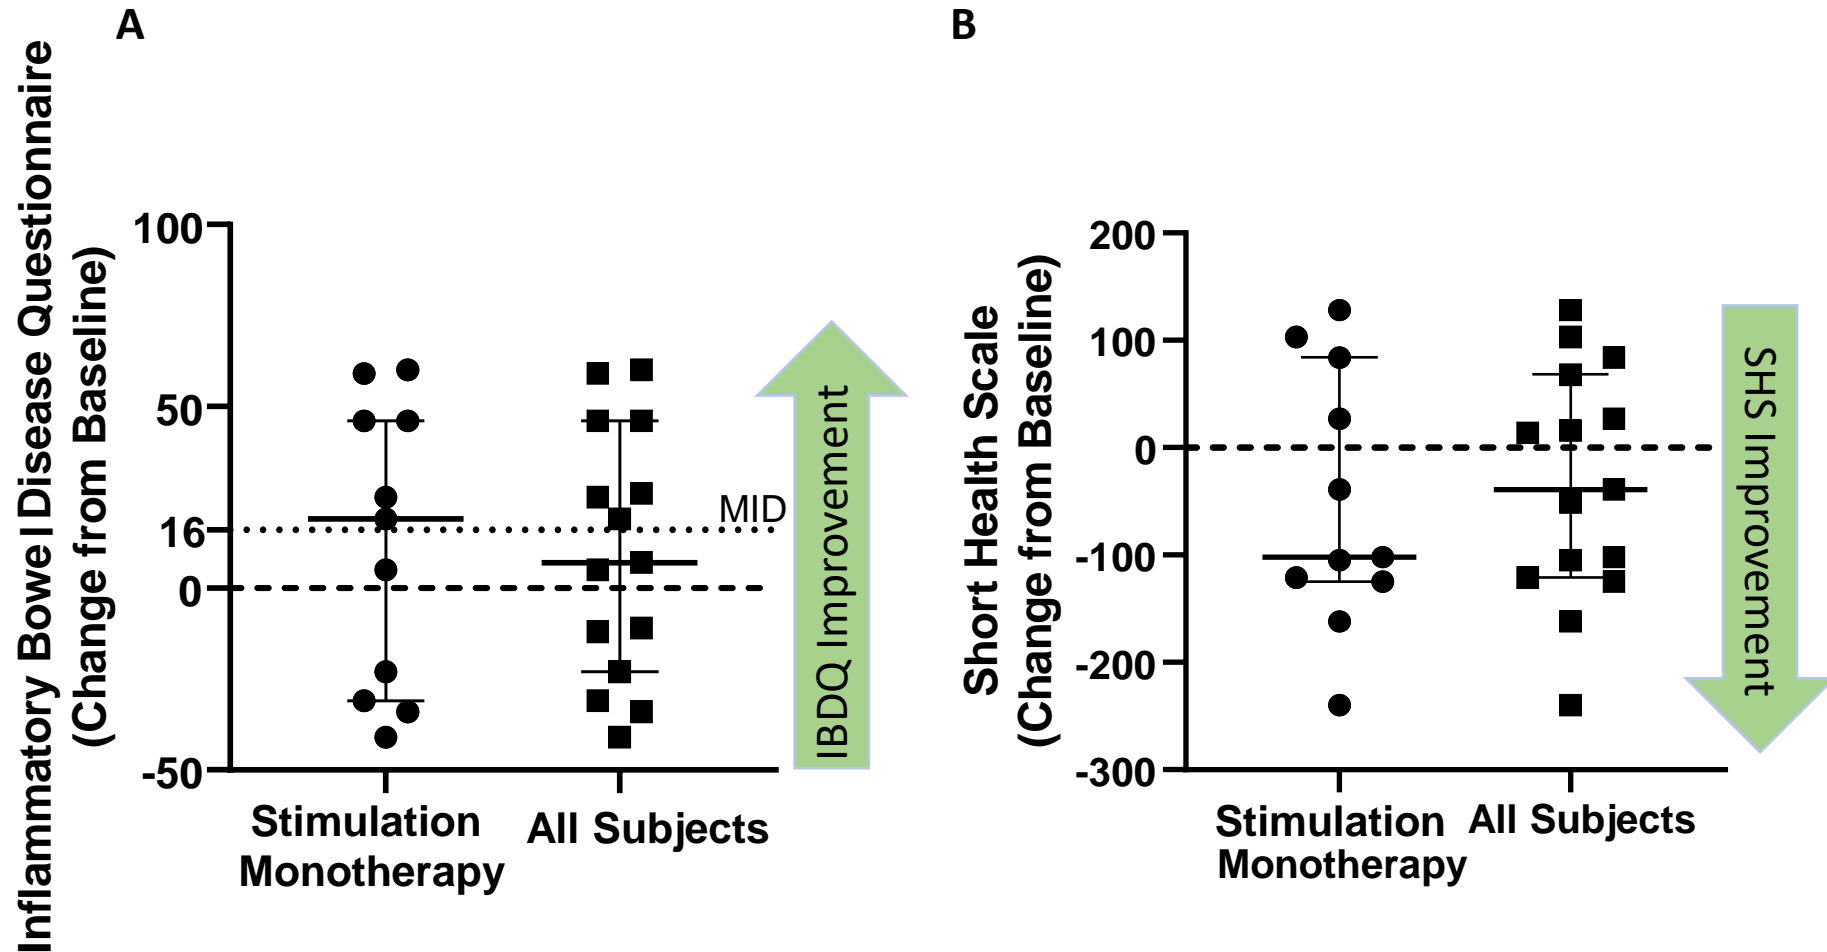

**Supplementary Figure 5. Change in Disability Indices.** [A] Change from baseline in the Inflammatory Bowel Disease Questionnaire and [B] Change from baseline in the Short Health Scale. Data plotted as median  $\pm$  interquartile range.

# Supplementary Figure 6: Per Patient Changes in Serum Cytokines

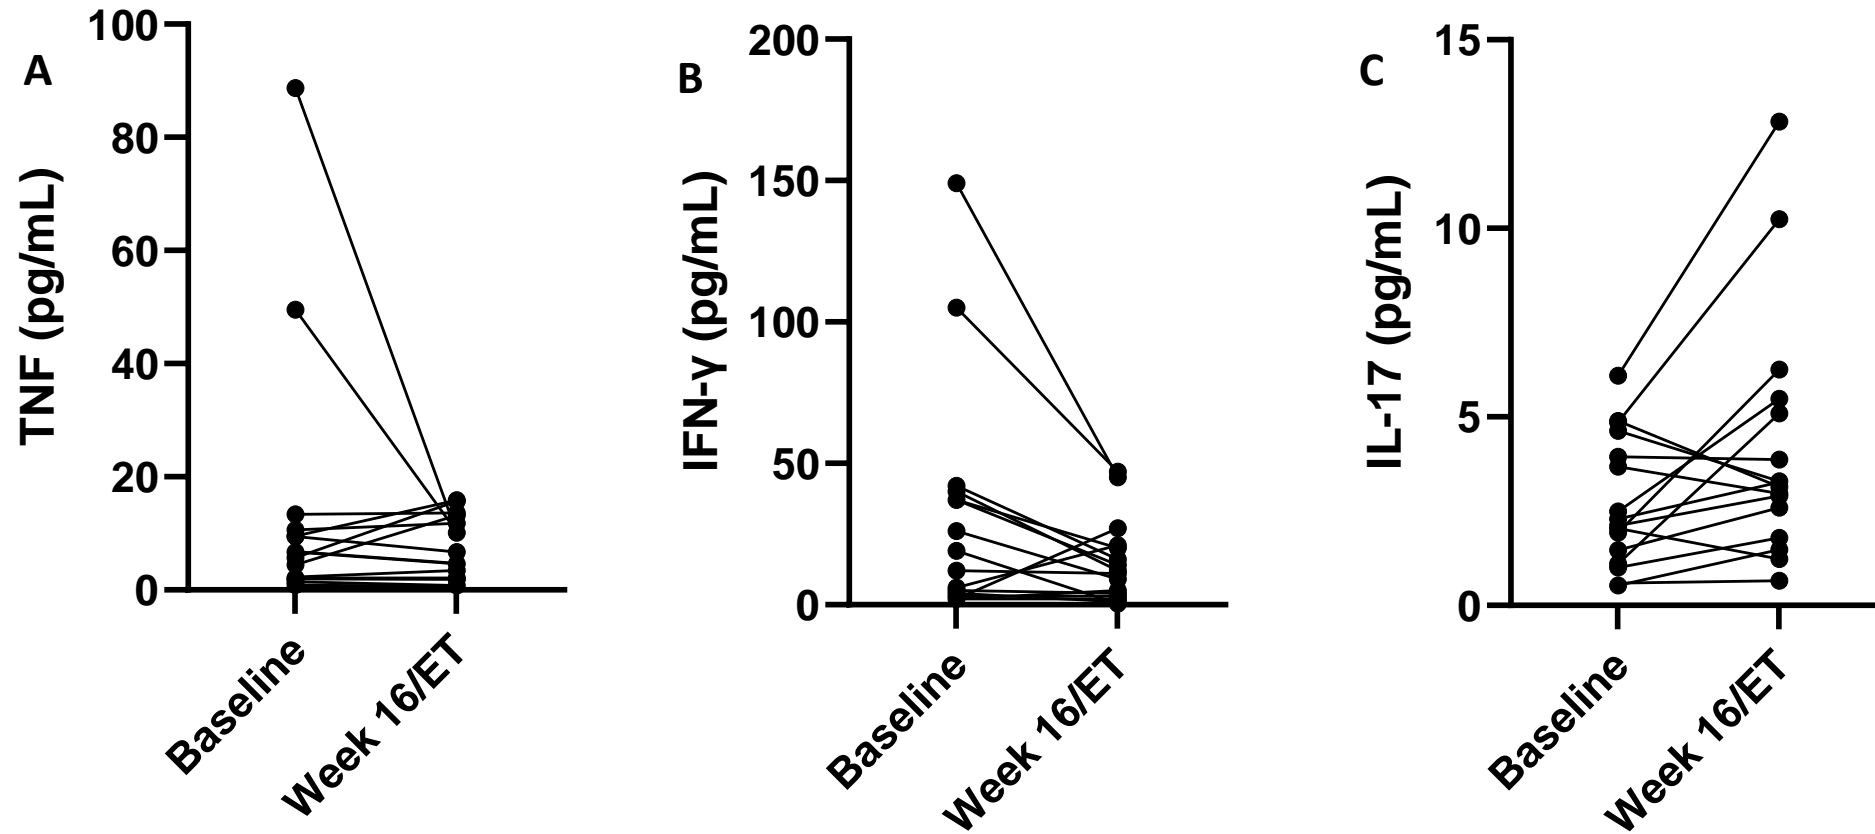

**Supplementary Figure 6. Per Patient Changes in Serum Cytokines. [A] Change in TNF [B] Change in IFN- $\gamma$  [C] Change in IL-17; ET, Early termination.**



# Supplementary Figure 7: Analysis Of Outcomes in CDAI-Responders

## Clinical and Patient Reported Outcomes

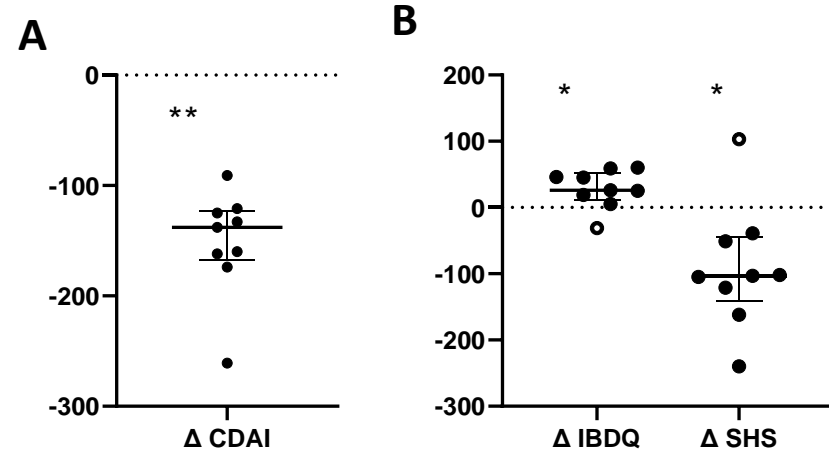

## Objective Outcomes

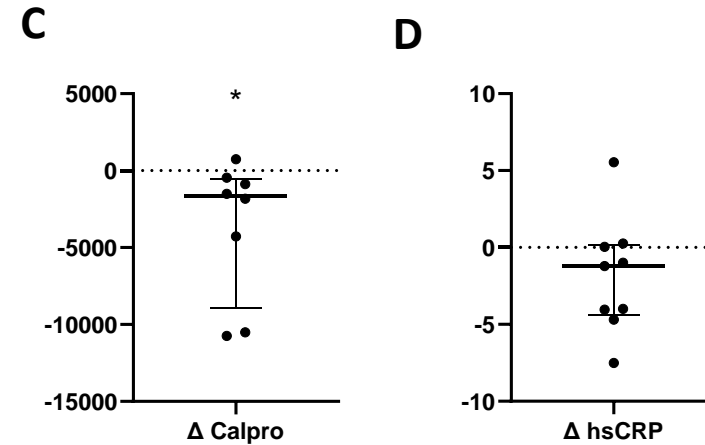

**G**

|                   | Median | n | P value summary | P value (two tailed) |
|-------------------|--------|---|-----------------|----------------------|
| Δ CDAI            | -138   | 9 | **              | 0.004                |
| Δ Calpro          | -1664  | 8 | *               | 0.023                |
| Δ hsCRP           | -1.205 | 9 | ns              | 0.203                |
| Δ SES-CD          | -2.333 | 8 | ns              | 0.313                |
| ΔSES; Total Colon | -3.25  | 8 | *               | 0.047                |
| Δ IBDQ            | 26     | 9 | *               | 0.039                |
| Δ SHS             | -103   | 9 | *               | 0.031                |

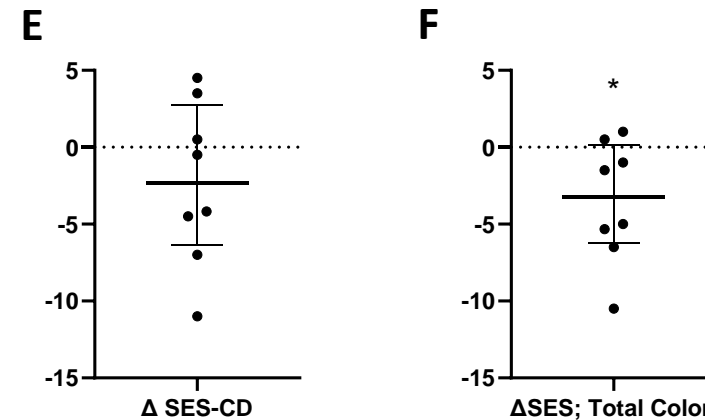

**Supplementary Figure 7. Analysis Of Outcomes in CDAI-Responders.** Posthoc analyses of changes from baseline of select outcomes in patients with a CDAI-70 response at Week 12 or 16 (n=9) **[A]** Change in CDAI **[B]** Change in IBDQ and SHS. The hollow points represent the same subject and move against clinical response **[C]** Change in faecal calprotectin **[D]** Change in hsCRP **[E]** Change in SES-CD **[F]** Change in the total colon component of the SES-CD **[G]** Statistics table of analyzed outcomes. Wilcoxon column test was used to compare the median change from baseline with a hypothetical change of 0. \*p<0.05, \*\*p<0.01. Data plotted as median ± interquartile range.

# Supplementary Figure 8A-B. Spearman correlation heatmap across clinical, molecular, endoscopic, and quality of life outcomes.

**A**

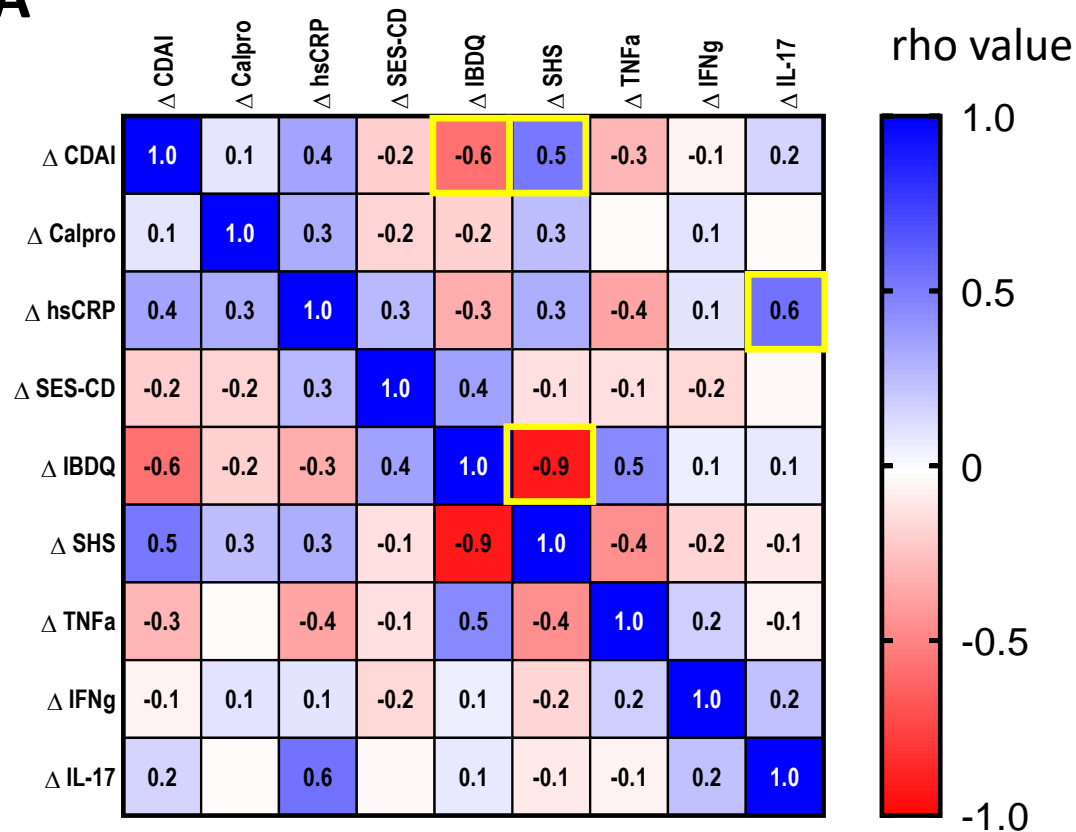

**B**

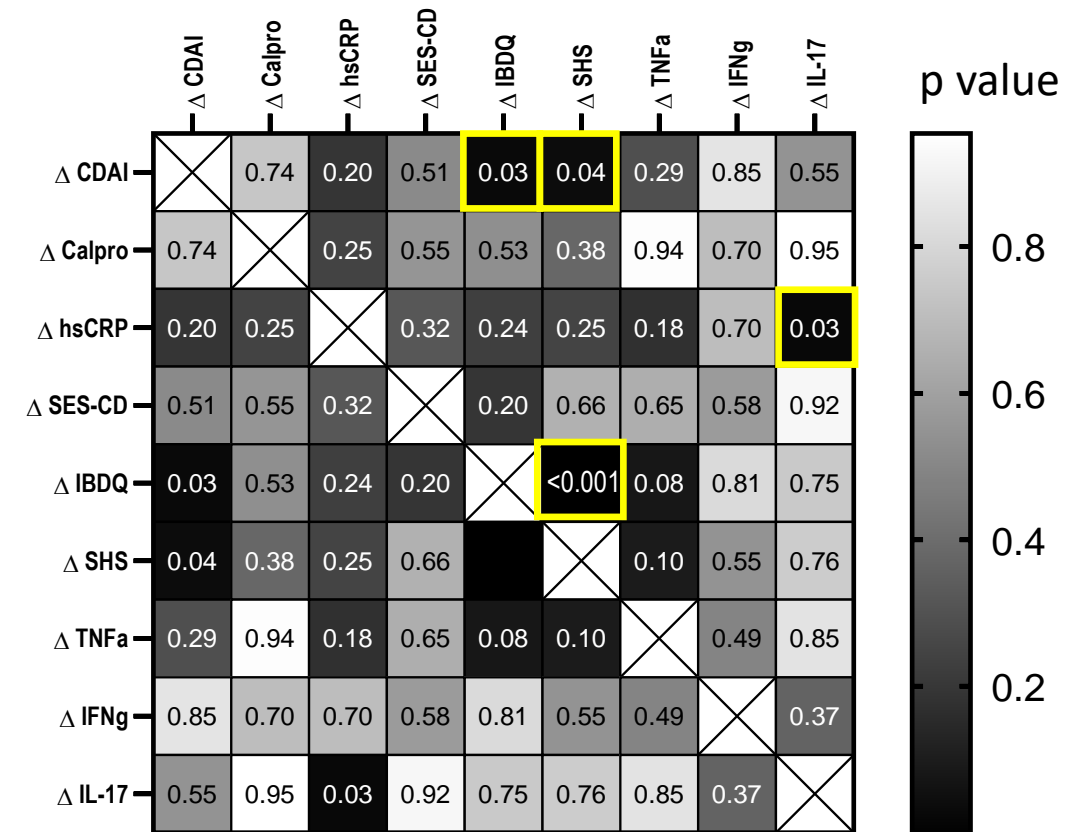

Supplementary Figure 8C-D. Spearman correlation heatmap of the change in serum cytokines levels in patients that achieved a CDAI-100 response.

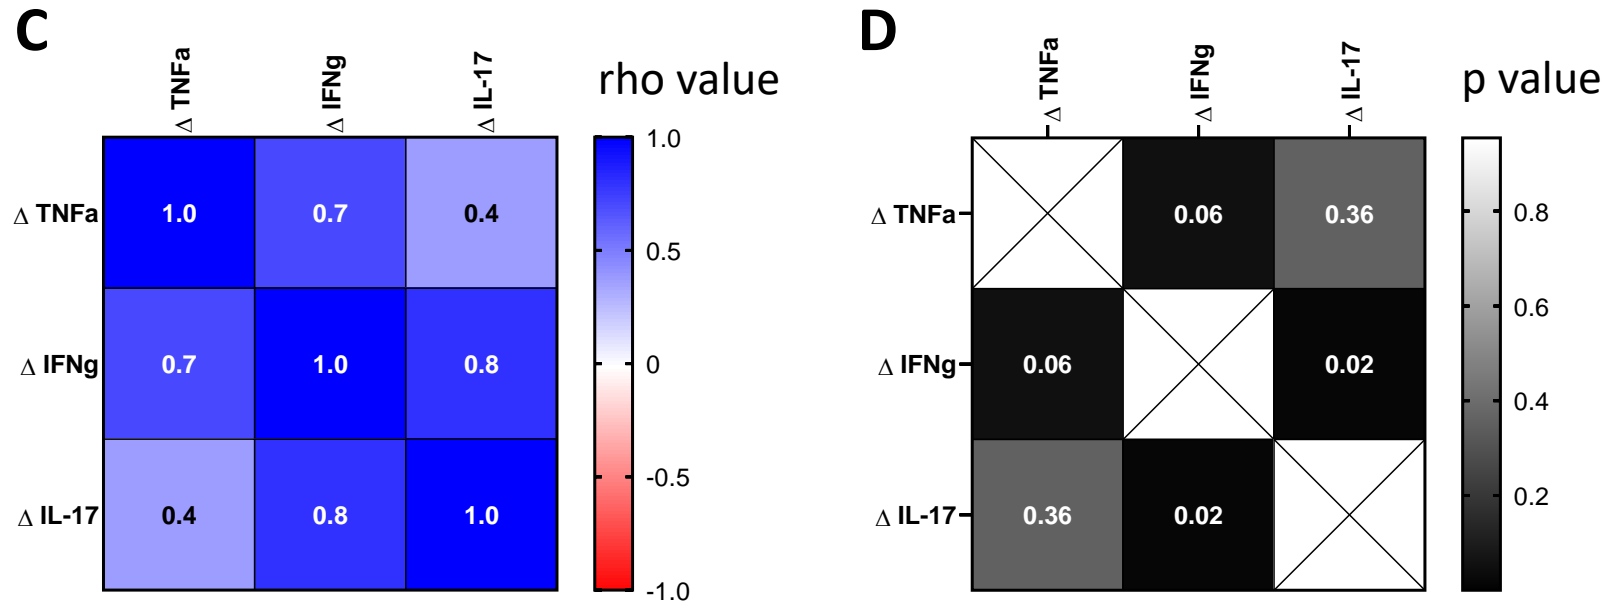

**Supplementary Figure 8. Spearman correlation heatmaps [A-B]** Spearman correlation heatmap across clinical, molecular, endoscopic, and quality of life outcomes. The change in CDAI was significantly correlated to changes in the quality-of-life assessments: positively correlated to the change in SHS and negatively correlated to the change in IBDQ (Spearman  $r > |0.5|$ ,  $p < 0.05$ ). As expected, the changes in SHS and IBDQ were strongly negatively correlated (Spearman  $r = -0.9$ ,  $p = 0.000$ ). There was a similar, but weaker correlative trend in changes in TNF levels and in SHS and IBDQ (Spearman  $r > |0.4-0.5|$ ,  $p < 0.1$ ). Changes in hsCRP and IL-17 were significantly correlated (Spearman  $r = 0.6$ ,  $p = 0.03$ ) as were the percent change from baseline in calprotectin and hsCRP (Spearman  $r = 0.8$ ,  $p = 0.001$ ), not shown. Yellow boxes highlight the cells where  $p < 0.05$ . **(C-D)** Spearman correlation heatmap of the change in serum cytokines levels in patients that achieved a CDAI-100 response. The change in serum levels of TNF, IL-17, and IFN- $\gamma$  move together in subjects that achieved a CDAI-100 response at Week 16. The correlation between IL-17 and IFN- $\gamma$  was significant, while all other interactions trended to or approached significance.

# Supplementary Table 1. Inclusion and Exclusion Criteria

## Inclusion Criteria

**Patients must meet all of the following inclusion criteria in order to be eligible for enrollment in this study:**

- Male or female Patients aged 18-75 years, inclusive
- Written informed consent prior to any of the screening procedures
- Diagnosis of Crohn's disease for more than 4 months prior to Week -4 Visit, with small bowel and/or colonic involvement
- Current evidence of moderately-to-severely active disease defined by a Week -4 Visit Crohn's Disease Activity Index (CDAI) score of 220 to 450, inclusive
- Simple Endoscopic Score for Crohn's Disease evaluation at baseline showing presence of a minimal ulcer score of 2 or 3 in at least 1 segment
- Levels of fecal calprotectin greater than or equal to 200 microgram/gram feces at Week -4 Visit
- History of inadequate response and/or intolerance or adverse events to one or more TNF-alpha inhibitors (e.g., infliximab, adalimumab, or certolizumab pegol), or vedolizumab.
- Female Patients of child-bearing potential are eligible if not pregnant, not planning to become pregnant during the course of the study, and committed to use of contraceptive methods with a failure rate of less than 1 percent per year

## Exclusion Criteria

**Patients who meet any of the following criteria are not to be enrolled in this study:**

- Celiac disease
- Diagnosis of ulcerative or indeterminate colitis
- Enterocutaneous, abdominal or pelvic fistulae with abscesses, or fistulae likely to require surgery during the course of the study period
- Bowel surgery, other than appendectomy, within 12 weeks prior to Week -4 Visit and/or has planned surgery or deemed likely to need surgery for Crohn's disease during the study period

## Exclusion Criteria continued

- Extensive colonic resection, subtotal or total colectomy
- Presence of ileostomies, colostomies or rectal pouches
- Fixed symptomatic stenoses of small bowel or colon
- History of more than 3 small bowel resections or diagnosis of short bowel syndrome
- Use of prohibited medications inside the specified washout period (prior to Week -4 Visit), and throughout the study. Prohibited medications include the following:
  - TNF antagonists and vedolizumab may continue throughout the study, but treatments should have been given at a stable dose for at least 6 months prior to the screening date and should be maintained at this level throughout the study
  - Use of natalizumab within 8 weeks
  - Use of glucocorticoids at doses greater than 10 mg prednisone orally QD, or an equivalent dose of other oral or parenteral glucocorticoids within 4 weeks
  - Use of cyclosporine, tacrolimus, sirolimus or mycophenolate mofetil within 4 weeks
  - Use of intravenous antibiotics for Crohn's disease within 4 weeks
  - Use of parenteral, tube or enteral feeding, or elemental diet within 2 weeks
  - Rectal Treatment: Use of 5-aminosalicylates or corticosteroid enemas or suppositories within 2 weeks
  - Azathioprine, 6-mercaptopurine and methotrexate can be continued throughout the trial. These medications must have been used for >12 weeks, at stable dose for at least 3 weeks prior to the Week -4 Visit.
- Leukocytapheresis or granulocytapheresis within 2 weeks prior to Week -4 Visit
- Positive immunoassay for *Clostridium difficile* at Week -4 Visit
- Known HIV infection
- Known active infection with HBV or HCV
- Current evidence of, or has been treated for a malignancy within the past five years (other than localized basal cell or squamous cell skin cancer, cervical dysplasia, or any cancer which has been fully staged as *in situ* and has been fully resected)

## Exclusion Criteria continued

- History of evidence of adenomatous colonic polyps that have not been removed.
- Use of any investigational product within 30 days prior to Week -4 Visit for small molecules, or 8 weeks prior for monoclonal antibodies
- Significant psychiatric disease or substance abuse
- History of unilateral or bilateral vagotomy
- History of recurrent vaso-vagal syncope episodes
- Known obstructive sleep apnea
- Known history of cardiac rhythm disturbances, atrio-ventricular block of greater than first degree, or cardiac conduction pathway abnormalities other than isolated right bundle branch block or isolated left anterior fascicle block. Evaluation by a cardiologist is required if the family history, patient history, or electrocardiogram suggests an abnormal cardiac conduction pathway.
- Significant pharyngeal dysfunction or swallowing difficulties
- Pre-existing clinically significant vocal cord damage or hoarseness
- Previously implanted electrically active medical devices (e.g., cardiac pacemakers, automatic implantable cardioverter-defibrillators)
- Asthma or chronic obstructive pulmonary disease not controlled by medications, or any other disease causing clinically significant dyspnea at time of screening
- A greater than or equal to 40 pack-year smoking history
- Active peptic ulcer disease
- Patients with a limited life expectancy due to terminal illness

# Supplementary Table 2. Change in Geboes Subcategories

| Histopathological Subcategories         | Ileum |       |            | Global Colon |       |            | Rectum |       |            |
|-----------------------------------------|-------|-------|------------|--------------|-------|------------|--------|-------|------------|
|                                         | mean  | std   | 95% CI     | mean         | std   | 95% CI     | mean   | std   | 95% CI     |
| <b>Architectural Damage</b>             | -1.0  | 1.2   | -2.8 - 0.8 | 0.1          | 0.3   | -0.1 - 0.2 | -0.3   | 0.7   | -0.8 - 0.3 |
| <b>Epithelial Damage</b>                | -1.0  | 0.8   | -2.3 - 0.3 | 0.1          | 1.0   | -0.5 - 0.7 | -0.3   | 1.0   | -1.1 - 0.6 |
| <b>Epithelium polymorphonuclear</b>     | -0.8  | 1.7   | -3.5 - 2   | 0.3          | 1.1   | -0.4 - 1   | 0.1    | 0.8   | -0.6 - 0.8 |
| <b>Erosions/Ulcers</b>                  | -0.8  | 0.5   | -1.5 - 0   | -0.1         | 0.6   | -0.5 - 0.2 | -0.1   | 0.6   | -0.7 - 0.4 |
| <b>Granuloma</b>                        | 0.0   | 0.0   | - - -      | 0.1          | 0.4   | -0.1 - 0.4 | 0.0    | 0.5   | -0.4 - 0.4 |
| <b>Lamina mononuclear</b>               | -1.0  | 1.2   | -2.8 - 0.8 | 0.0          | 1.0   | -0.6 - 0.6 | -0.5   | 0.9   | -1.3 - 0.3 |
| <b>Lamina polymorphonuclear</b>         | -0.5  | 0.6   | -1.4 - 0.4 | 0.0          | 0.6   | -0.3 - 0.3 | 0.1    | 0.6   | -0.4 - 0.7 |
| <b>Number biopsy specimens affected</b> | -1.3  | 1.5   | -3.6 - 1.1 | 0.2          | 0.4   | 0 - 0.4    | -0.4   | 0.7   | -1 - 0.2   |
| <b>REML p-value (Study Visit)</b>       |       | <0.01 |            |              | 0.136 |            |        | 0.934 |            |

## Supplementary Table 3. Serum cytokine

| Analyte               | GM-CSF        | IL-12 p40 | IL-15 human | IL-16 | IL-17        | IL-1 alpha | IL-5   | IL-7           | TNF beta      | VEGF   |
|-----------------------|---------------|-----------|-------------|-------|--------------|------------|--------|----------------|---------------|--------|
| Baseline mean (pg/mL) | 0.5           | 71.7      | 4.8         | 151.6 | 2.7          | 1.7        | 0.4    | 25.4           | 0.5           | 895.3  |
| Baseline SD (pg/mL)   | 1.0           | 68.8      | 5.3         | 171.9 | 1.7          | 2.0        | 0.7    | 13.7           | 0.7           | 1548.9 |
| Week 16 mean (pg/mL)  | 0.5           | 124.0     | 4.7         | 154.1 | 4.2          | 2.5        | 0.3    | 32.3           | 0.1           | 1616.5 |
| Week 16 SD (pg/mL)    | 0.8           | 112.0     | 5.8         | 142.7 | 3.3          | 3.4        | 0.8    | 22.3           | 0.2           | 4201.1 |
| Analyte               | IFN- $\gamma$ | IL-10     | IL-12 p70   | IL-13 | IL-1 $\beta$ | IL-2       | IL-4   | IL-6           | IL-8          | TNF    |
| Baseline mean (pg/mL) | 30.7          | 2.4       | 2.3         | 3.6   | 0.1          | 53.6       | 0.0    | 5.3            | 19.3          | 13.4   |
| Baseline SD (pg/mL)   | 41.3          | 4.5       | 1.8         | 5.0   | 0.1          | 211.2      | 0.0    | 5.8            | 17.0          | 23.2   |
| Week 16 mean (pg/mL)  | 14.9          | 1.9       | 2.1         | 4.7   | 0.1          | 43.8       | 0.0    | 7.0            | 18.7          | 7.3    |
| Week 16 SD (pg/mL)    | 14.6          | 1.5       | 1.9         | 6.4   | 0.1          | 171.7      | 0.0    | 7.2            | 11.7          | 5.6    |
| Analyte               | Eotaxin       | Eotaxin-3 | IL-8        | IP-10 | MCP-1        | MCP-4      | MDC    | MIP-1 $\alpha$ | MIP-1 $\beta$ | TARC   |
| Baseline mean (pg/mL) | 298.1         | 15.0      | 49.5        | 357.4 | 222.0        | 57.7       | 810.6  | 21.7           | 123.7         | 385.3  |
| Baseline SD (pg/mL)   | 200.0         | 11.2      | 60.1        | 543.9 | 136.7        | 60.2       | 528.5  | 11.6           | 93.2          | 355.9  |
| Week 16 mean (pg/mL)  | 266.8         | 18.7      | 55.7        | 262.9 | 233.9        | 62.7       | 1036.4 | 23.3           | 188.4         | 440.6  |
| Week 16 SD (pg/mL)    | 184.7         | 11.5      | 47.5        | 203.2 | 162.4        | 71.7       | 749.2  | 11.3           | 211.4         | 573.3  |



# Supplementary Table 4. Severe Adverse Events

| Subject ID            | Event Preferred Term           | Outcome                         | Severity | Causality                                      | Action taken on Device                  |
|-----------------------|--------------------------------|---------------------------------|----------|------------------------------------------------|-----------------------------------------|
| A                     | Crohn's disease                | RWS                             | Moderate | Not Related                                    | None                                    |
|                       | Gastroenteritis viral          | RWS                             | Severe   | Not Related                                    | None                                    |
| B                     | Ileus                          | RWS                             | Severe   | Not Related                                    | Other: NA                               |
|                       | Crohn's disease                | RWS                             | Severe   | Not related                                    | Other: NA                               |
| C                     | Dehydration                    | RWS                             | Severe   | Not Related                                    | None                                    |
|                       | Prerenal failure               | RWS                             | Severe   | Not Related                                    | None                                    |
| D                     | Crohn's disease                | RWS                             | Severe   | Not Related                                    | None                                    |
|                       | Inflammation                   | RWS                             | Severe   | Not Related                                    | Discontinued                            |
| E                     | Cachexia                       | RWS                             | Severe   | Not Related                                    | Discontinued                            |
| F                     | Crohn's disease                | RWS                             | Moderate | Not Related                                    | Implantation of device has been delayed |
| G (Safety population) | Post-operative wound infection | RWS                             | Moderate | Implantation or explantation procedure-related | Removed                                 |
| H                     | Crohn's disease                | RWS: disease ongoing at Week 16 | Moderate | Not Related                                    | None                                    |

RWS: Recovered with sequelae
